# Supplementary material for: Extended Reality-based Proof-of-Concept to Clinical Assessment Balance and Postural Disorders for Personalized Innovative Protocol
Source: Research Square preprint supplement (doi:10.21203/rs.3.rs-6164358/v1), 2025-04-24
Supplement: Supplementary file 1 [file a9e3d1417cf1cbbe5e367a88.docx]

**SUPPLEMENTARY VIDEOS**

**Additional file 1 (.mp4): IDBA from user point-of-view**

Video of the Innovative Dynamic Balance Assessment (IDBA) exercise experience recorded from the HL2 point of view. In the prospective of the user, the holographic game is projected in a static position in space, while Pacman moves in real-time according to the center of pression of the user. The ghosts appears in order at specific instants of time and disappears when colliding with Pacman.

**Additional file 2 (.mp4): IDBA from Unity engine**

Video of the Innovative Dynamic Balance Assessment (IDBA) exercise experience recorded from Unity engine platform Scene panel. In the prospective of the therapist who sets the parameters and observes the monitor, the interface of Unity shows in real-time, on the left of the monitor, the skeleton reconstructed by the Kinect and the user point-of-view on the right.

**Additional file 3 (.mp4): SVV from user point-of-view**

Video of the Subjective Visual Vertical (SVV) experience recorded from the HL2 point of view. The user sees the projection of the blue “bucket” and the white rod rotating. When the rod stops, the user can press the holographic buttons with the hand to rotate the rod and positioned it in a vertical position. The hand of the user is recognized by the system and it is represented with a grey cube for each joints and a blue sphere for the tip of the index finger. The yellow cube represents the direction of the user’s gaze obtained by the eye tracking feature.
